# Supplementary material for: Bioassay Guided Isolation and Docking Studies of a Potential β-Lactamase Inhibitor from Clutia myricoides
Source: PubMed Central journal article supplement (PMC7321312; doi:10.3390/molecules25112566), 2020-05-31
Supplement: molecules-25-02566-s001.pdf [file molecules-25-02566-s001.pdf]

# Bioassay Guided Isolation and Docking studies of a Potential $\beta$ - Lactamase Inhibitor from *Clutia myricoides*

Mahmoud A. Elfaky<sup>1</sup>, Ali M. El-Halawany<sup>2</sup>, Abdulrahman E Koshak<sup>1</sup>

Khalid Z Alshali<sup>3</sup>, Moustafa El-Araby<sup>4</sup> and Hossam M. Abdallah<sup>1,2,\*</sup>

<sup>1</sup>Department of Natural Products, Faculty of Pharmacy, King Abdulaziz University, Jeddah  
21589, Kingdom of Saudi Arabia

<sup>2</sup>Department of Pharmacognosy, Faculty of Pharmacy, Cairo University, Cairo 11562, Egypt

<sup>3</sup>Department of Medicine, Faculty of Medicine, King Abdulaziz University, Jeddah, Saudi  
Arabia

<sup>4</sup>Department of Medicinal Chemistry, Faculty of Pharmacy, King Abdulaziz University, Jeddah  
21589, Kingdom of Saudi Arabia

\* Correspondence: Dr. Hossam M. Abdallah; email: [hmafifi2013@gmail.com](mailto:hmafifi2013@gmail.com), Tel.: +966-544-

733-110

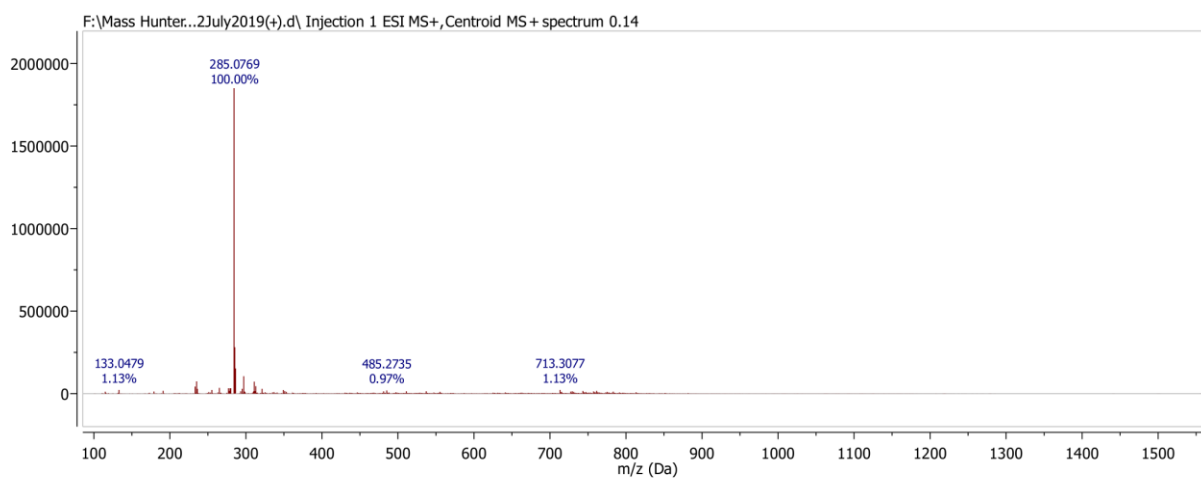

**Figure S1:** HRESIMS spectrum of compound **2**.

Dr. Hossam  
Sample : CLMC-6-1 CDCl<sub>3</sub>

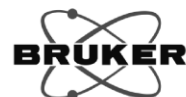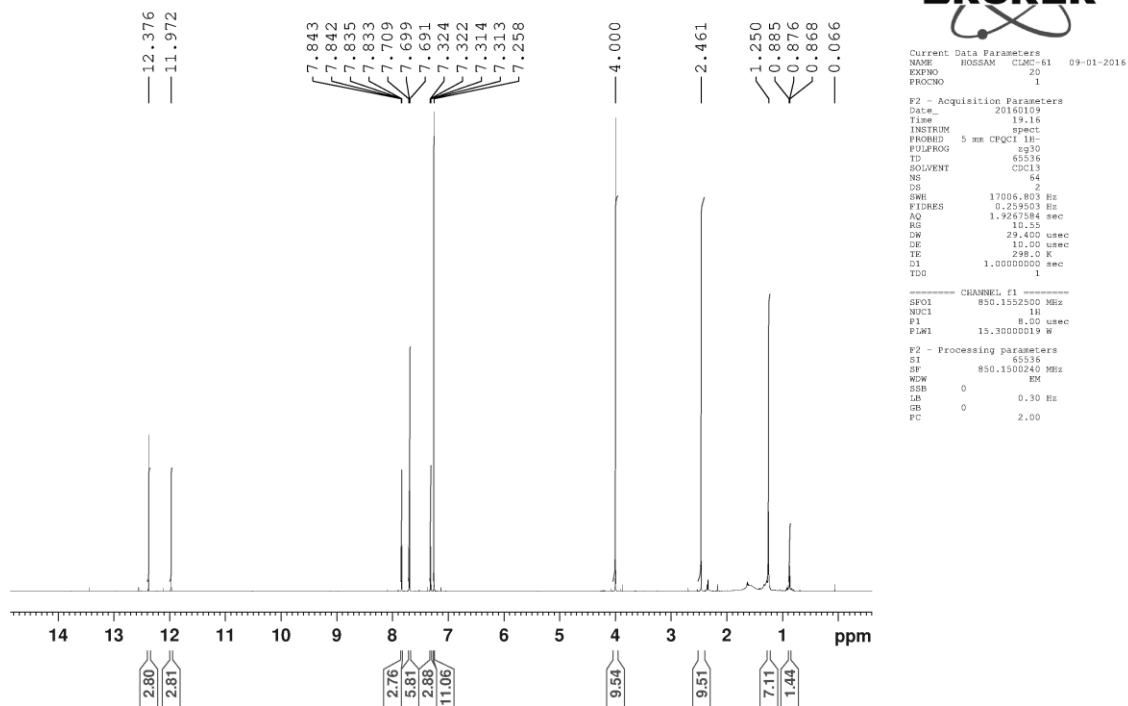

Figure S2: <sup>1</sup>H NMR spectrum of compound 2 (850 MHz, CDCl<sub>3</sub>).

Dr.Hossam  
Sample : CLMC-6-1

CDCL3

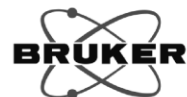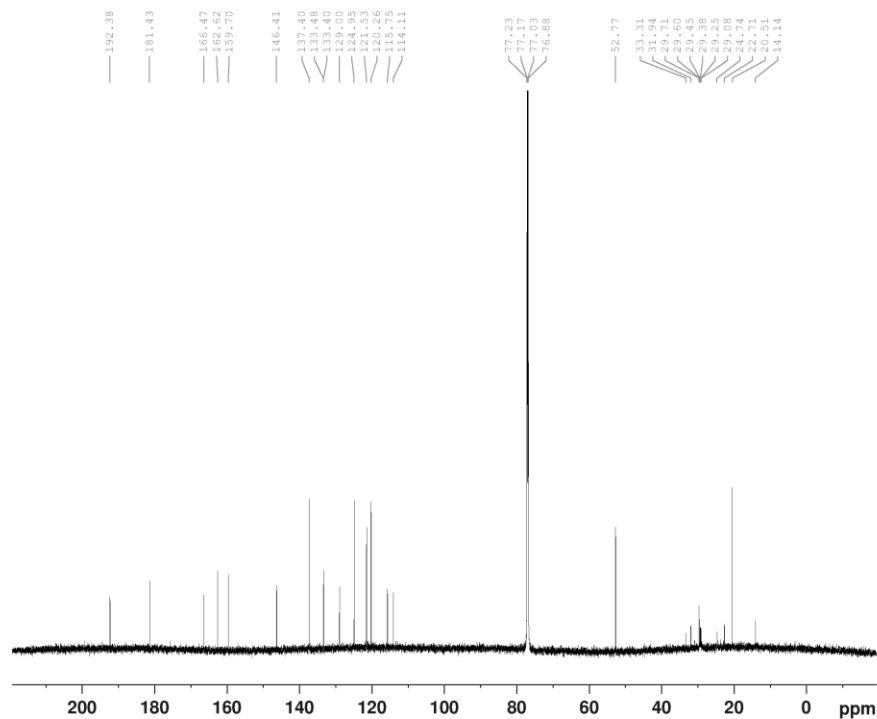

```
Current Data Parameters
NAME      HOSSAM   CLMC-61  17-01-2016
EXPNO    10
PROCNO   1

F2 - Acquisition Parameters
Data_    20160117
Time     10.03
INSTRUM  spect
PROBHD   5 mm CPQCI 1H-
PULPROG  zgpg30
TD       65536
SOLVENT  CDCl3
NS       1116
DS       4
SWH      51020.406 Hz
FIDRES   0.778510 Hz
AQ       0.6422528 sec
RG       185.83
DM       9.800 usec
DE       18.00 usec
TE       298.0 K
D1       2.00000000 sec
D11      0.03000000 sec
TDO      1

===== CHANNEL f1 =====
SFO1     213.7917636 MHz
NUC1     13C
P1       12.00 usec
PLM1     130.00000000 W

===== CHANNEL f2 =====
SFO2     850.1534006 MHz
NUC2     1H
CPDPRG2  waltz16
PCPD2    80.00 usec
PLM2     13.80000019 W
PLM3     0.13800000 W
PLM3     0.08832000 W

F2 - Processing parameters
SI       32768
SF       213.7703875 MHz
WDW      EM
SSB      0
LB       1.50 Hz
GB       0
PC       2.00
```

Figure S3:  $^{13}\text{C}$  NMR spectrum of compound 2 (214 MHz,  $\text{CDCl}_3$ ).

Dr. Hossam  
Sample :

CLMC-61 CDCL3

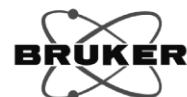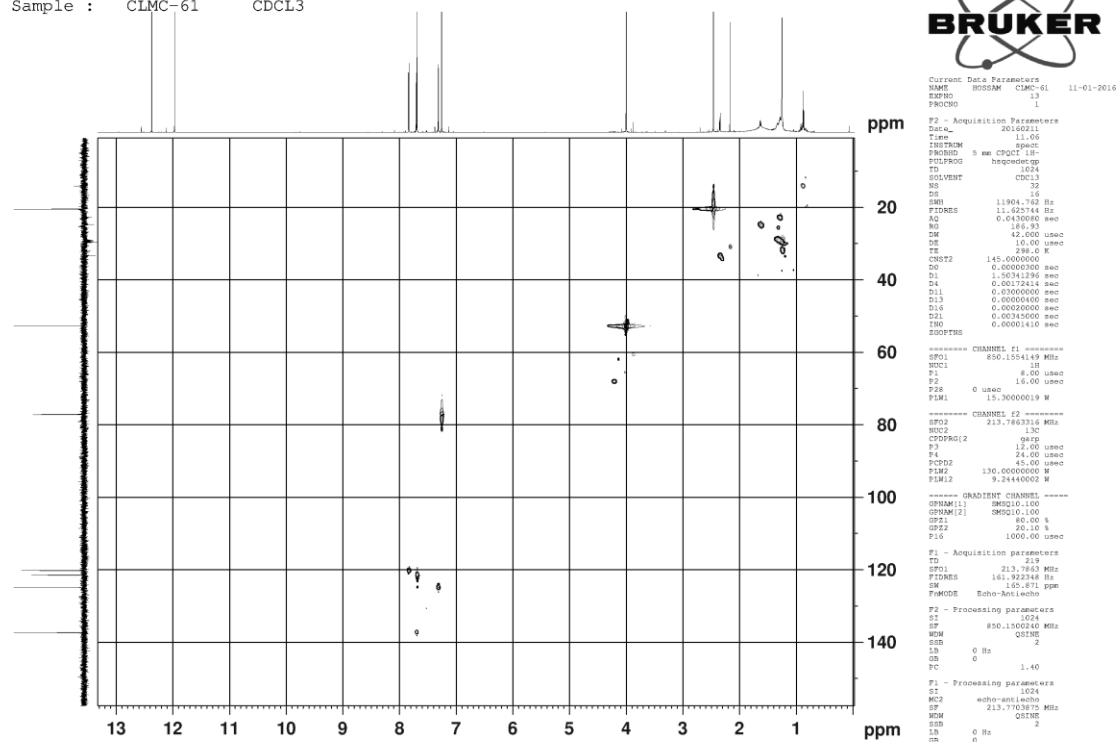

Figure S4: HSQC spectrum of compound 1 (CDCl<sub>3</sub>).

Dr. Hossam  
Sample : CLMC-61 CDCL3

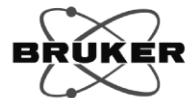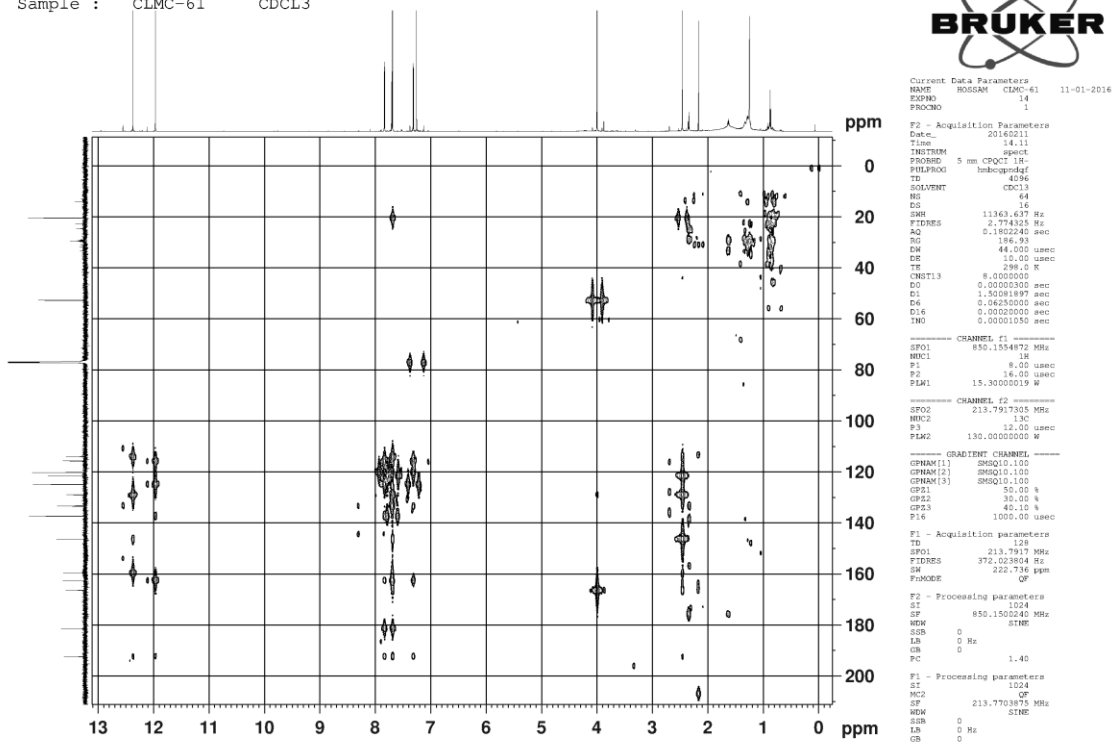

Figure S5: HMBC spectrum of compound 1 (CDCl<sub>3</sub>).

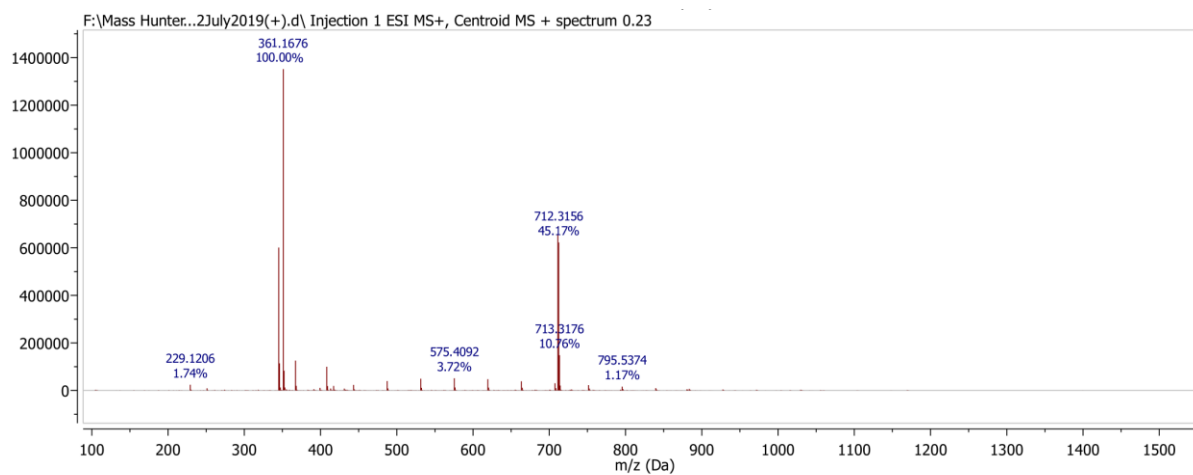

**Figure S6:** HRESIMS spectrum of compound **5**.

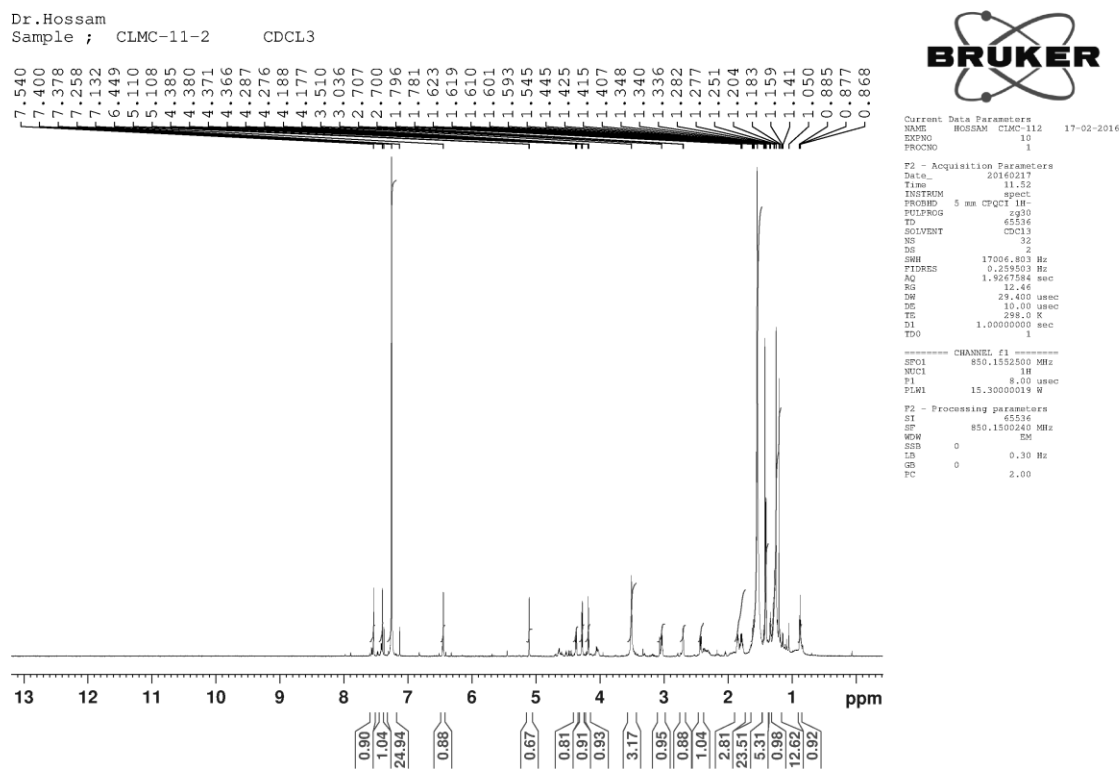

Figure S7. <sup>1</sup>H NMR spectrum of compound 5 (850 MHz, CDCl<sub>3</sub>).



Dr. Hossam  
Sample : CLMC-11-2

CDCL<sub>3</sub>

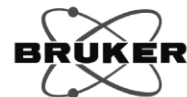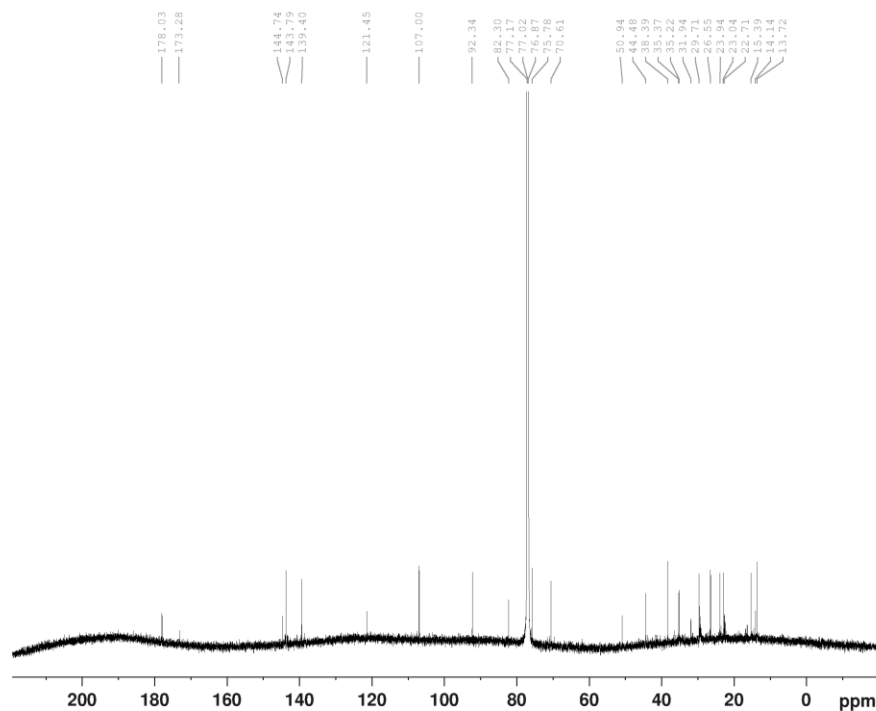

```
Current Data Parameters
NAME      HOSSAM   CLMC-112
EXPNO    10
PROCNO   1

F2 - Acquisition Parameters
Date_    20160227
TIME     22.25
INSTRUM  spect
PROBHD   5 mm QNP1H-
PULPROG  zgpg30
TD        65536
SOLVENT  CDCl3
NS        14336
DS        4
SWH       51020.406 Hz
FIDRES   0.778510 Hz
AQ        0.6482258 sec
RG         186.93
DE         9.500 usec
TE        298.0 K
D1        2.0000000 sec
D11       0.0300000 sec
TD0       1

===== CHANNEL f1 =====
RF01     213.7917436 MHz
NUC1      13C
P1        12.00 usec
PLW1     130.0000000 W

===== CHANNEL f2 =====
RF02     850.1334006 MHz
NUC2      1H
CPDPRG2  waltz16
PCPD2    80.00 usec
PLW2     13.8000019 W
PLW12    0.13800000 W
PLW13    0.08832000 W

F2 - Processing parameters
SI        32768
SF        213.7703875 MHz
WDW       EM
SSB       0
LB        1.50 Hz
GB        0
PC        2.00
```

Figure S8: <sup>13</sup>C NMR spectrum of compound 5 (214 MHz, CDCl<sub>3</sub>).

Dr. Hossam  
Sample : CLMC-11-2 CDCL3

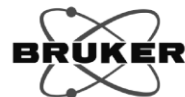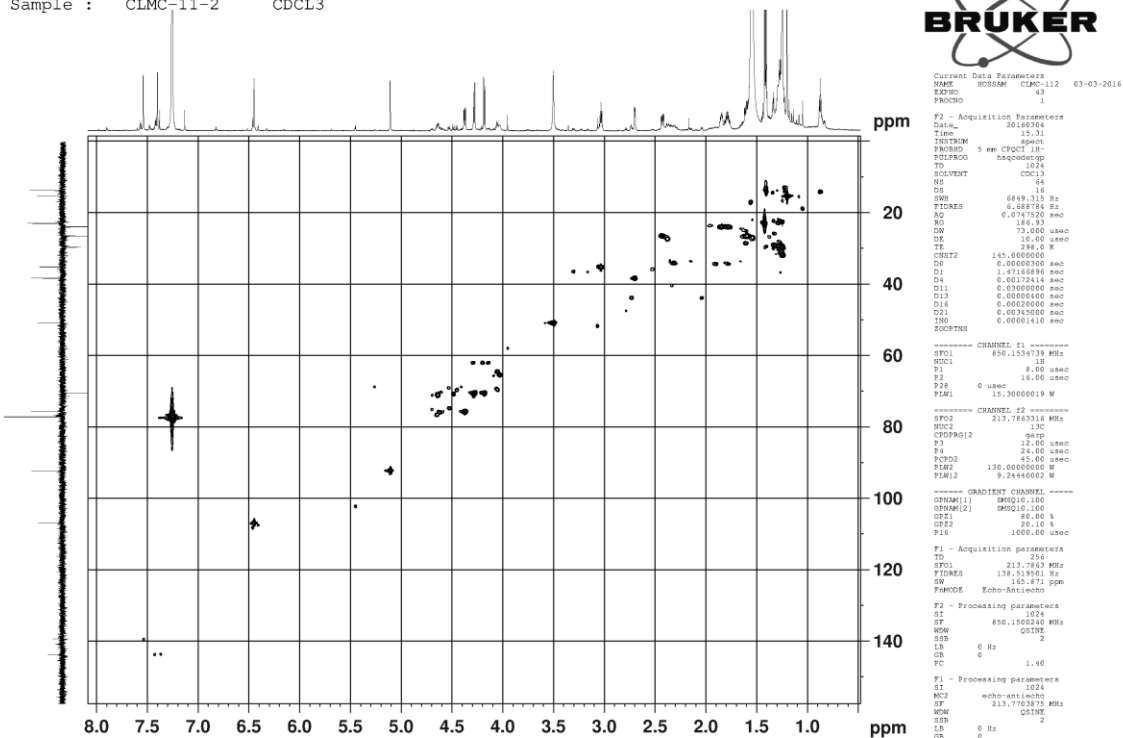

Figure S9: HSQC spectrum of compound 5 (CDCl<sub>3</sub>).

Dr. Hossam  
Sample : CLMC-11-2 CDCL3

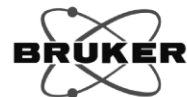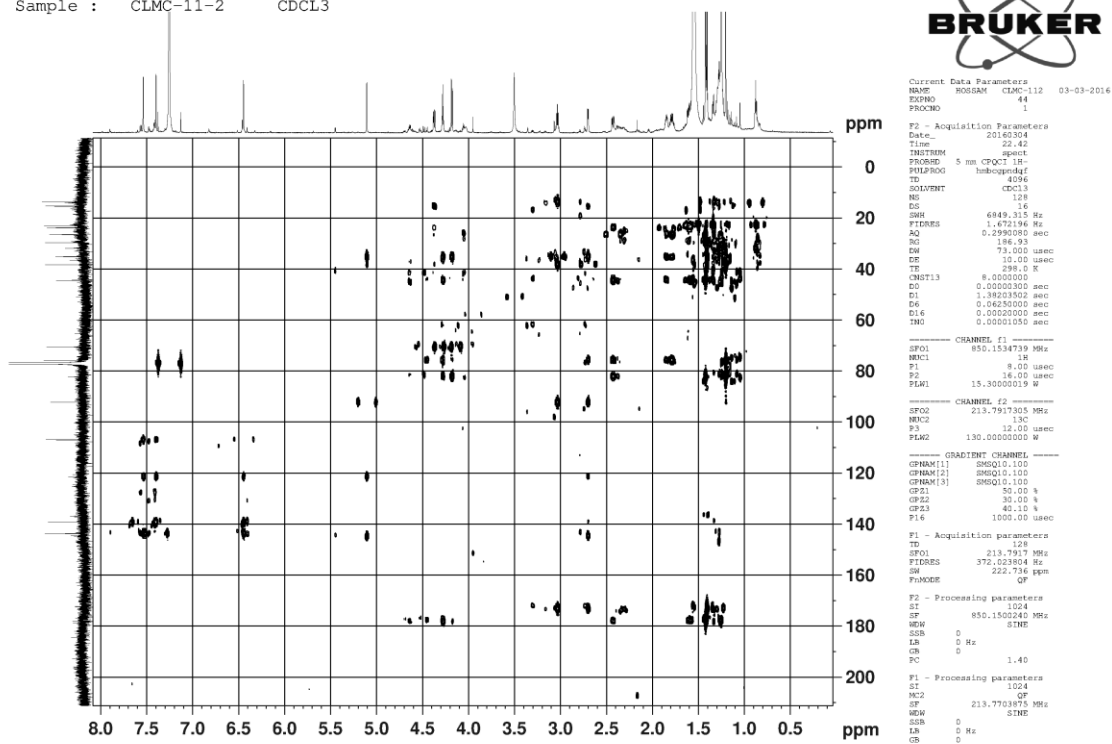

Figure S10: HMBC spectrum of compound 5 (CDCl<sub>3</sub>).

Dr.Hossam  
Sample : CLMC-11-2 CDCL3  
NOESYPHSW CDCL3 D:\ nmr

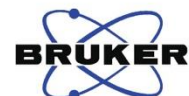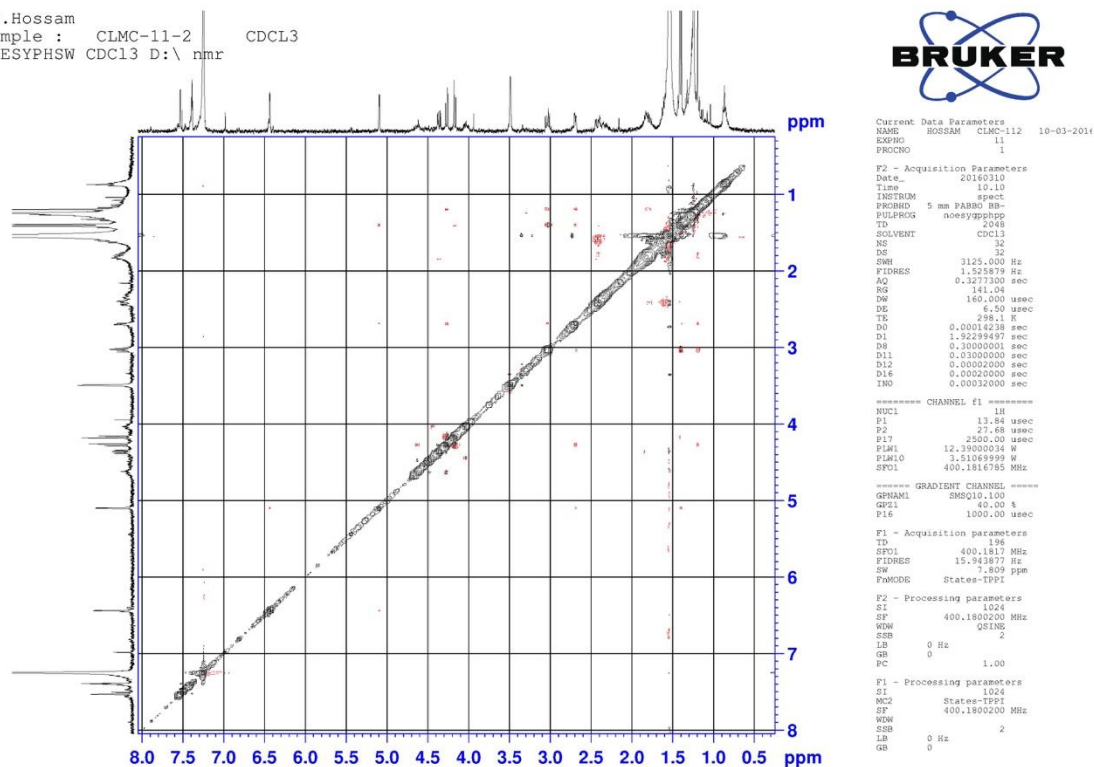

Figure S11: NOESY spectrum of compound 5 (CDCl<sub>3</sub>).
